# Supplementary material for: Age-Related Variation in Sympathetic Nerve Distribution in the Human Spleen
Source: Front Neurosci. 2021 Oct 14;15:726825. doi: 10.3389/fnins.2021.726825 (PMC8552063; doi:10.3389/fnins.2021.726825)
Supplement: Supplementary Table 1 — Data of separate individuals. [file Data_Sheet_1.XLSX]

## Sheet: Totaal  Publicatie
Supplemenatry data
Data of separate individuals
25-70 years N=7
Patient#	Sex	Age	Cause of death	PALS	%	score 1	%	score 2	%	score 3	%	Capsule	Trabeculae	Large vessels	Small vessels	Red pulp	Total tissue Area in pixels	CD3 positive Area in pixels	% Area CD3	Total Tissue Area in pixels (TH)	TH postive Area in pixels	% Area TH
1	F	46	Pancreatic tail cyst	9/38	24	8	21	1	3	0	0	2	1	3	3	0			21.42			0.0234
2	F	66	Myocardial infarct	18/31	58	5	16	8	26	5	16	NA	2	2	2	1			12.44			0.0492
3	F	52	Subarachnoid haemorrhage	36/37	97	3	8	29	78	4	11	0	2	2	2	1			10.23			0.03706
4	F	48	Traumatic motor bike accident	0/31	0	0	0	0	0	0	0	0	1	1	1	0			7.02			0.01258
5	M	66	Unknown	19/29	66	12	41	7	24	0	0	0	2	2	2	1			5.43			0.13103
6	M	26	Arrythmia	21/32	66	7	22	11	34	3	9	1	1	1	1	0			10.18			0.037
7	M	29	Long QT syndrome	22/34	65	9	26	10	29	3	9	0	1	1	1	0			20.29			0.03942
10-25 years N=7
Patient	Sex	Age	Cause of death	PALS	%	score 1	%	score 2	%	score 3	%	Capsule	Trabeculae	Large vessels	Small vessels	Red pulp	Total tissue Area in pixels	CD3 positive Area in pixels	% Area CD3	Total Tissue Area in pixels (TH)	TH postive Area in pixels	% Area TH
8	F	14	Acute unexpected death, probably due to cardiac arrest	19/33	58	17	52	2	6	0	0	0	1	2	2	1	21373971	2880603	13.4772	16416455	98588	0.600544
9	M	16	Arrythmia	31/35	89	7	20	11	31	13	37	0	2	2	2	0			7.95			0.06937
10	M	11	Sudden unexpected death due to coronary artery anomaly	23/34	68	12	35	9	26	2	6	0	1	3	2	1	18314504	1696205	9.26154	18468258	32394	0.175404
11	M	11	New diabetes mellitus with keto-acidosis	17/29	59	10	34	6	21	1	3	0	1	2	1	1	19304211	1865074	9.66149	12468086	10629	0.0852497
12	F	12	Unknown	14/40	33	10	25	4	10	0	0	1	3	3	3	2	35323919	2783146	7.87893	22560075	19653	0.0871141
13	M	11	Herniation of the sigmoid due to congenital mesenterial defect	33/35	94	14	40	16	46	3	9	0	3	3	3	2	28242947	970269	3.43544	28424419	46561	0.163806
14	F	24	Lung emboly	30/34	88	7	21	19	56	4	12	0	1	2	2	0			5.5			0.1053
40 weeks N=12
Patient	Sex	Age	Cause of death	PALS	%	score 1	%	score 2	%	score 3	%	Capsule	Trabeculae	Large vessels	Small vessels	Red pulp	Total tissue Area in pixels	CD3 positive Area in pixels	% Area CD3	Total Tissue Area in pixels (TH)	TH postive Area in pixels	% Area TH
15	M	40 w 2 d	Asphyxia	14/35	40	9	26	3	9	2	6	2	1	2	2	2	16782282	1456791	8.68053	16612823	3300	0.0198642
16	F	39 w	Asphyxia	38/40	95	11	28	19	48	8	23	2	2	2	2	2	19298165	1696752	8.7923	19549173	4435	0.0226864
17	M	40 w 1 d	Asphyxia	20/40	50	15	38	5	13	0	0	2	1	3	3	1	16142409	2292588	14.2023	16666007	10693	0.0641605
18	M	42 w 3 d	Asphyxia	13/40	33	12	30	1	3	0	0	1	1	3	2	2	25099257	2698032	10.7494	25391993	1532	0.0060334
19	F	41 w	Asphyxia	34/40	85	16	40	15	38	3	8	2	2	3	3	2	19840036	4226380	21.3023	20631788	15089	0.0731347
20	M	40 w 4 d	Asphyxia	20/40	50	15	38	5	13	0	0	1	2	3	3	3	15154327	1495234	9.86671	20356748	2658	0.0130571
21	M	40 w 1 d	Asphyxia	26/40	65	10	25	11	28	5	13	1	1	3	2	1	40165841	2705249	6.7352	21025950	2359	0.0112195
22	M	40 w	Asphyxia, congenital heart defect	36/40	90	19	48	13	33	4	10	2	2	3	3	3	24104356	5282031	21.9132	23264661	44066	0.189412
23	M	40 w 4 d	Asphyxia	26/40	65	20	50	6	15	0	0	3	1	3	3	2	21580287	2231346	10.3397	23367929	16156	0.0691375
24	M	42 w 3 d	Asphyxia	30/40	75	14	35	15	38	1	3	2	1	3	2	1	20436208	2914909	14.2635	24504468	4309	0.0175845
25	F	42 w 1 d	Asphyxia, first born of bichorionic twin	32/40	80	16	40	14	35	2	5	2	1	3	3	1	19926243	1392571	6.98863	199997314	46197	0.0230988
26	M	41 w 7 d	Asphyxia	33/40	83	24	60	9	23	0	0	1	0	2	2	1	22951043	3908741	17.0308	25611345	23584	0.0920842

## Sheet: Sheet1
Patient#	PALS	%	1	2	3	Capsule	Trabeculae	Large vessels	Small vessels	Red pulp	Opmerking

## Sheet: Sheet2
				PALS	%	1	2	3	Capsule	Trabeculae	Large vessels	Small vessels	Red pulp
S13-026				0/40	0	0	0	0	0	1	2	1	1
S07 139				36/40	90	19	13	4	2	2	3	3	3
